# Supplementary material for: The Reconfigurable Maze Provides Flexible, Scalable, Reproducible, and Repeatable Tests
Source: PubMed Central journal article supplement (PMC6992939; doi:10.1016/j.isci.2019.100787), 2019-12-19
Supplement: mmc1.pdf [file mmc1.pdf]

**iScience, Volume 23**

## **Supplemental Information**

### **The Reconfigurable Maze Provides Flexible, Scalable, Reproducible, and Repeatable Tests**

**Satoshi Hoshino, Riku Takahashi, Kana Mieno, Yuta Tamatsu, Hirotsugu Azechi, Kaoru Ide, and Susumu Takahashi**

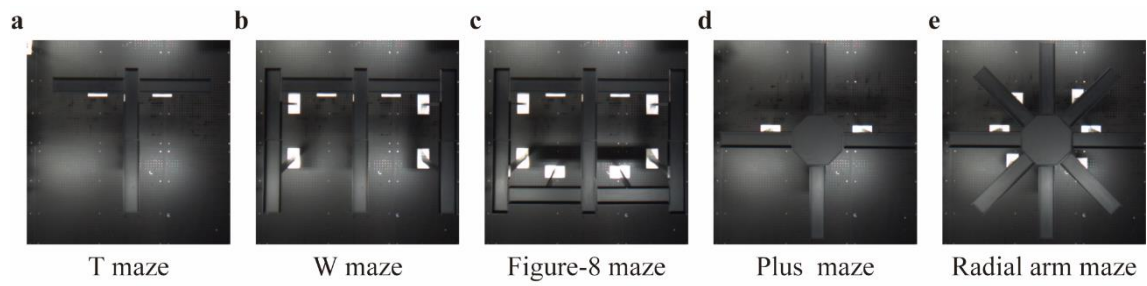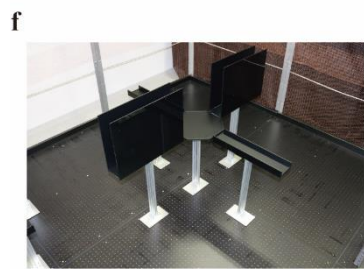

f Plus maze with walls

- 1
- 2 **Figure S1. Top view of configured mazes, Related to Figure 1.** (a–e) Top view of maze shape
- 3 configured to T (a), W (b), figure-8 (c), plus (d), and radial arm (e) mazes in an enclosure. This
- 4 view demonstrates that several shapes of the maze can be configured in the same space. (f) The
- 5 plus maze configured with tall sidewalls for testing anxiety.

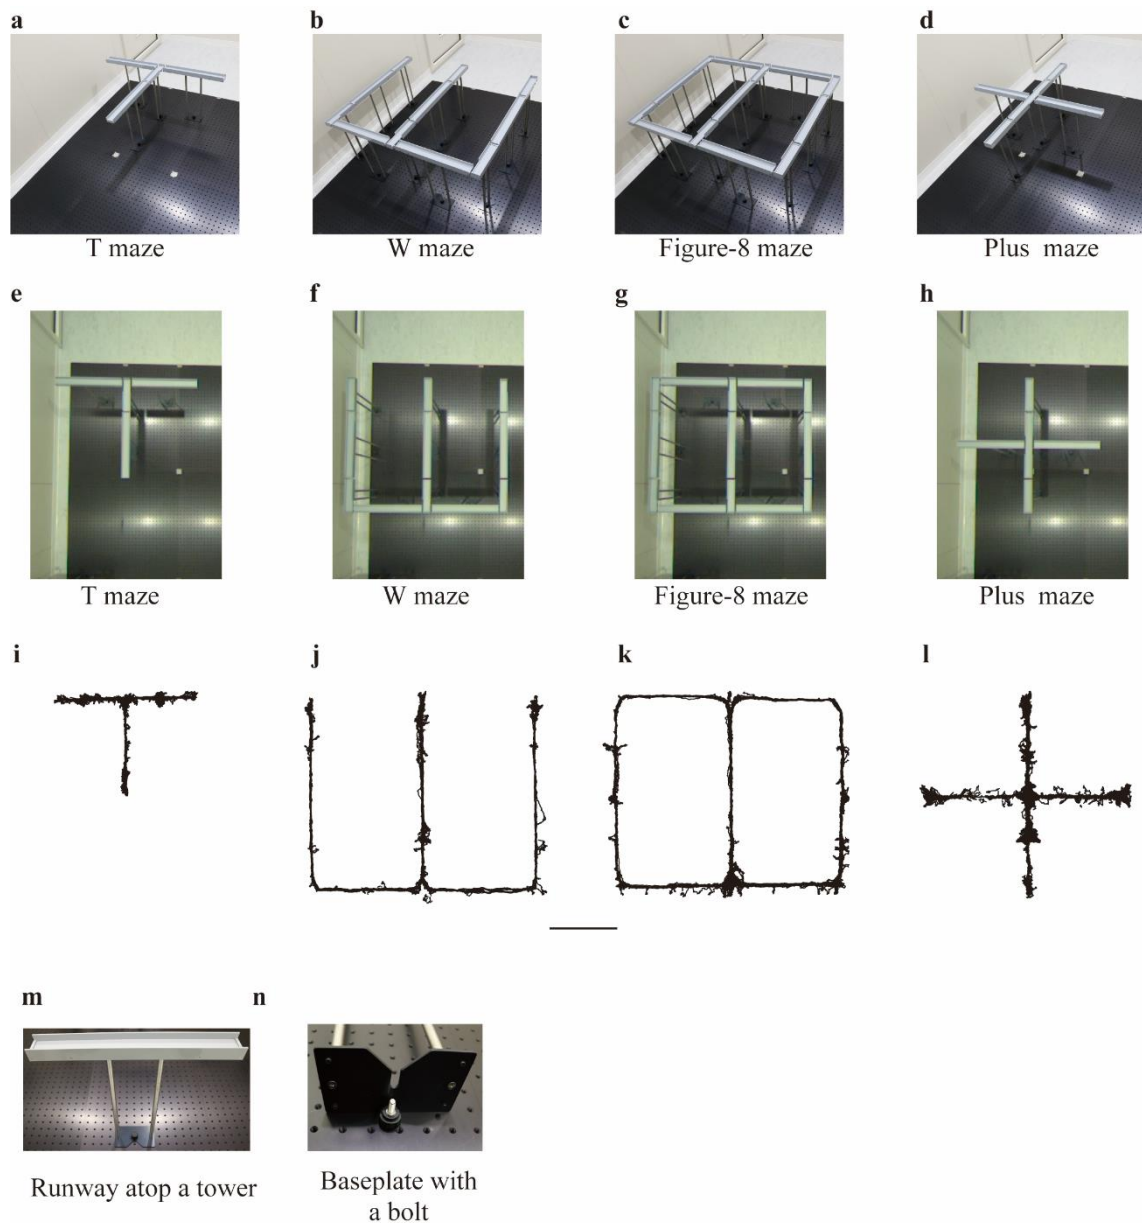

6

7 **Figure S2. The reconfigurable maze for mice, Related to Figure 1.** (a–d) The shape was  
 8 configured to match T (a), W (b), figure-8 (c), and plus (d) mazes in an enclosure. (e–h) Top view  
 9 of the mazes. Note that the central stem remains in the same position. (i–l) Example running  
 10 trajectory of a mouse in each maze. Scale bar, 40 cm. (m) The runway is placed atop a tower on  
 11 a breadboard with a grid of holes. (n) The baseplate of the tower is fixed by a bolt because the  
 12 weight of the baseplate alone is too light to support the runway. The grid of the breadboard allows  
 13 the flexible coordination of the runways and accessory parts in repeatable ways.

14

15

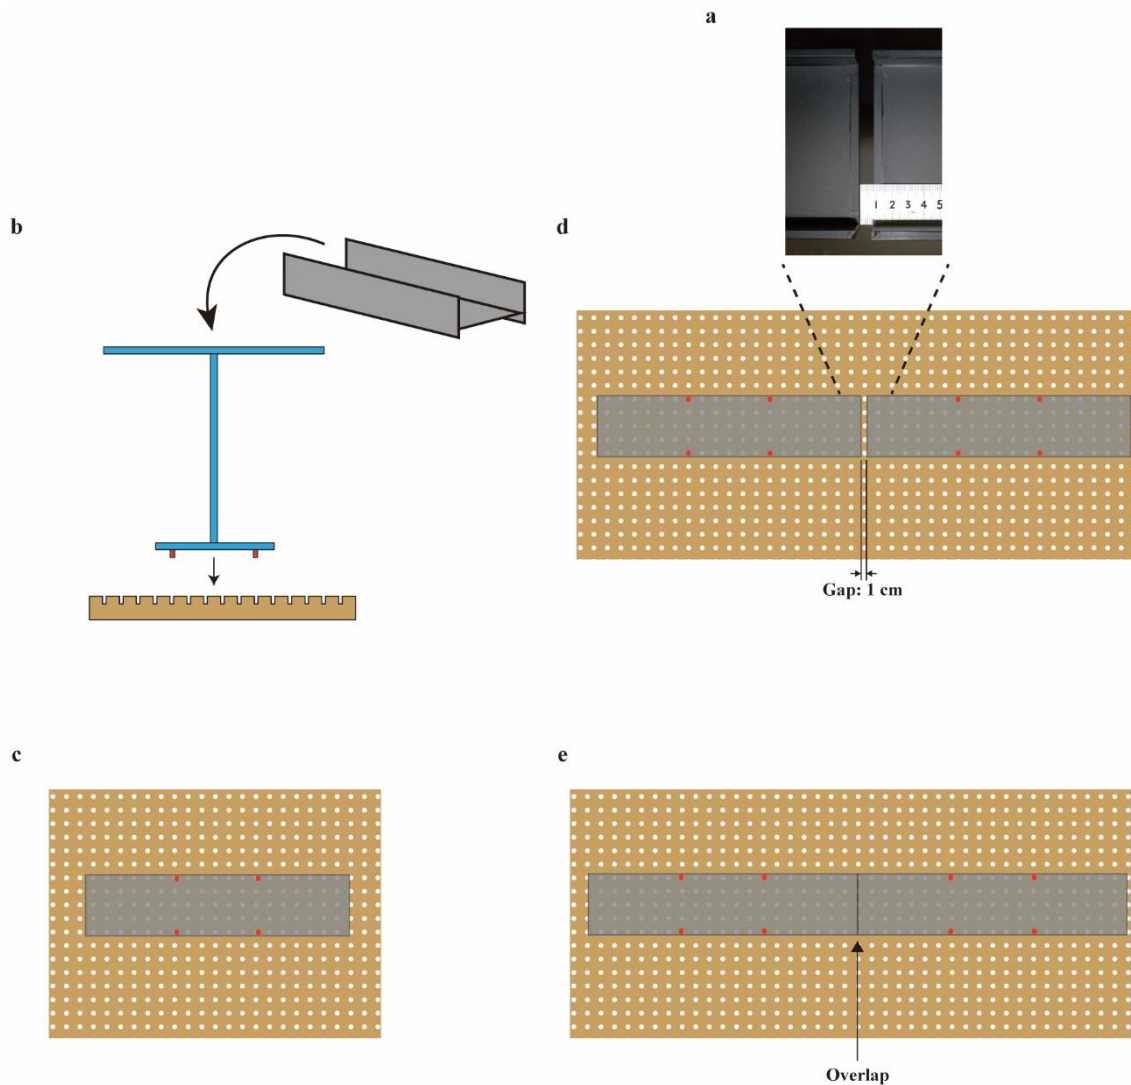

16

17 **Figure S3. A short gap between runways is a prerequisite margin for the interlocking parts,**

18 **Related to Figure 1. (a)** Close-up photo showing the gap. **(b)** The runway (gray) is placed atop

19 a tower (blue) on a breadboard (brown) with a grid of holes. The baseplate of the tower has

20 protrusions (red) that coordinate the placement of the section on the breadboard. **(c)** Top view of

21 a runway on the breadboard. **(d)** Two runways with a 1 cm gap. **(e)** This view demonstrates that

22 the runways overlap only if the total dimensional error exceeds a precision of 1 cm.

23

24

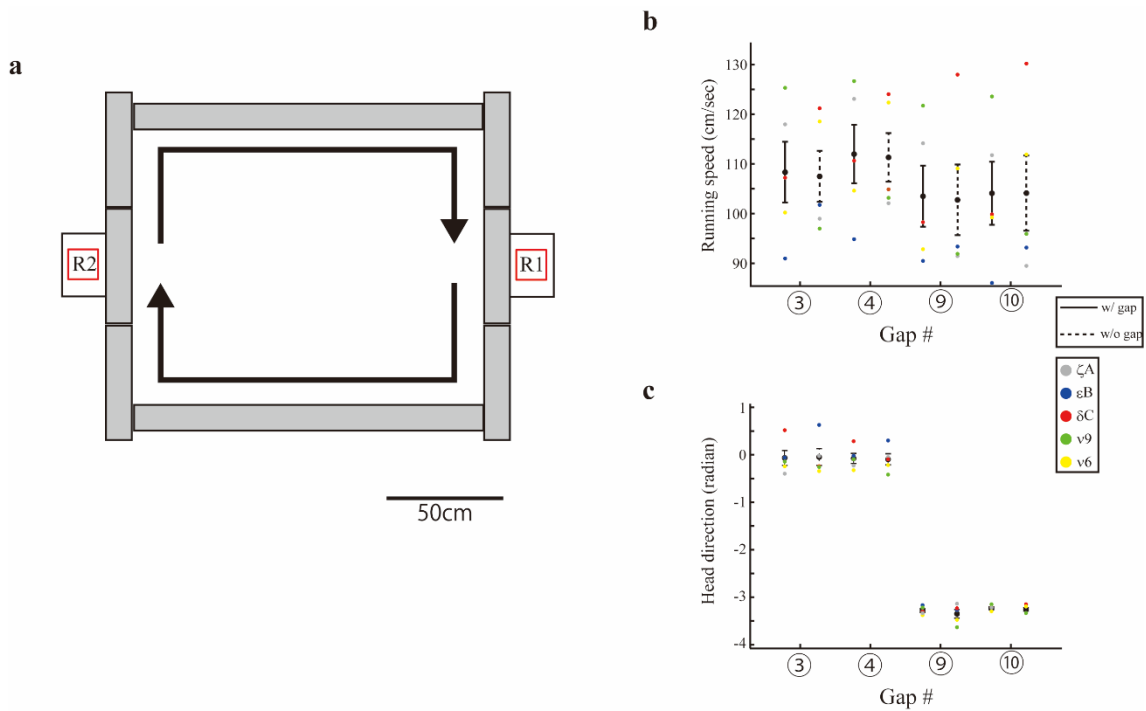

25

26 **Figure S4. The running speed and head direction on the runway with or without gaps,**

27 **Related to Figure 2. (a)** Schematic showing two gapless runways placed at the top and bottom

28 of the square-shaped maze. R1 and R2 indicate food dispensers. **(b–c)** The running speed **(b)**

29 and head direction **(c)** of five rats on the runways with gaps (solid line) and without gaps (dotted

30 line) as a function of the examined gap locations. The data from individual animals are overlapped

31 as color-coded dots. Neither running speed nor head direction were influenced by the presence

32 of a gap (simple main effect: gap presence vs. running speed between all pairs of the examined

33 gaps:  $P > 0.05$ , gap presence vs. head direction between all pairs of the examined gaps:  $P >$

34  $0.05$ ). However, there were interactions between gap presence and location (running speed:  $F_{1,4}$

35  $= 2653.9$ ,  $P < 10^{-6}$ ; head direction:  $F_{1,4} = 302.3$ ,  $P < 10^{-4}$ ) shown using two-way repeated-

36 measures ANOVA. Error bars indicate SEM.

37

38

39 **Table S1. Dimensions of the runway for the rat version of the reconfigurable maze, Related**  
 40 **to Figure 1.**

| Runway type     | Combination               |            |            |             |
|-----------------|---------------------------|------------|------------|-------------|
| Straight        | A, B, C, D, E             |            |            |             |
| Right           | C, F, G, H, I, J, K, L, T |            |            |             |
| Left            | C, F, G, H, I, J, K, L, T |            |            |             |
| Central         | C, F, H, I, J, K, L, T    |            |            |             |
| S-shaped        | H, M, N, O, P             |            |            |             |
| Right and Left  | C, Q, R, S, T             |            |            |             |
| Octagonal field | W, X, T                   |            |            |             |
| Long straight   | C, U, V, T                |            |            |             |
| Basic component | Polygon type              | Depth (mm) | Width (mm) | Height (mm) |
| A               | Rectangle                 | 5          | 490        | 100         |
| B               | Rectangle                 | 5          | 490        | 45          |
| C               | Rectangle                 | 2          | 100        | 5           |
| D               | Rectangle                 | 5          | 100        | 5           |
| E               | Rectangle                 | 5          | 440        | 10          |
| F               | Non-regular               | 5          | 485        | 100         |
| G               | Rectangle                 | 5          | 485        | 45          |
| H               | Rectangle                 | 5          | 100        | 45          |
| I               | Rectangle                 | 5          | 260        | 45          |
| J               | Rectangle                 | 10         | 480        | 15          |
| K               | Non-regular               | 10         | 480        | 15          |
| L               | Non-regular               | 2          | 230        | 10          |
| M               | Non-regular               | 5          | 480        | 100         |
| N               | Rectangle                 | 5          | 305        | 45          |
| O               | Non-regular               | 10         | 480        | 15          |
| P               | Non-regular               | 2          | 180        | 10          |
| Q               | Non-regular               | 5          | 490        | 100         |
| R               | Non-regular               | 2          | 330        | 10          |
| S               | Non-regular               | 10         | 450        | 15          |
| T               | Rectangle                 | 5          | 100        | 10          |
| U               | Rectangle                 | 5          | 685        | 100         |
| V               | Rectangle                 | 5          | 100        | 10          |

|   |             | Depth (mm) | Side (mm) |  |
|---|-------------|------------|-----------|--|
| W | Octagon     | 5          | 140       |  |
| X | Non-regular | 2          | 140       |  |

41 Runways can be assembled using a combination of basic components (A-X). All 3D models are  
42 freely available (<https://github.com/TakahashiLab/ReconfigurableMazeParts>).

43

44

45 **Table S2. Dimensions of the runway for the mouse version of the reconfigurable maze,**  
46 **Related to Figure 1.**

| Runway type     | Combination         |            |            |             |
|-----------------|---------------------|------------|------------|-------------|
| Straight        | A, B, C, D          |            |            |             |
| Right           | A, B, C, D, G, H, I |            |            |             |
| Left            | A, B, C, D, G, H, I |            |            |             |
| Right and Left  | A, C, D, G, H, I    |            |            |             |
| Central         | A, C, D, E, F       |            |            |             |
| Basic component | Polygon type        | Depth (mm) | Width (mm) | Height (mm) |
| A               | Rectangle           | 3          | 391        | 40          |
| B               | Rectangle           | 3          | 391        | 28          |
| C               | Rectangle           | 10         | 40         | 10          |
| D               | Rectangle           | 3          | 40         | 5           |
| E               | Rectangle           | 3          | 140        | 28          |
| F               | Rectangle           | 3          | 115        | 5           |
| G               | Rectangle           | 3          | 40         | 15          |
| H               | Rectangle           | 3          | 80         | 5           |
| I               | Rectangle           | 3          | 311        | 28          |

47 Runways can be assembled using a combination of basic components (A-I). All 3D models are  
48 freely available (<https://github.com/TakahashiLab/ReconfigurableMazeParts>).

49

50 **Table S3. Variability between rats: electrophysiological measurements, Related to Figure**  
 51 **5.**

| RAT #                                                                                                         | $\zeta A$       | $\delta B$      | $\delta A$      | $\varepsilon A$ | Total |
|---------------------------------------------------------------------------------------------------------------|-----------------|-----------------|-----------------|-----------------|-------|
| No. of pyramidal cells                                                                                        | 89              | 40              | 46              | 35              | 210   |
| No. of interneurons                                                                                           | 8               | 4               | 9               | 5               | 26    |
| Analyses for the square-shaped maze for gap effects                                                           |                 |                 |                 |                 |       |
| No. of place cells (spatial information > 0.1 bit/spike & peak firing rate > 1 Hz )                           | 28              | 18              | 14              | 2               | 62    |
| Spatial information (bits/spike, mean $\pm$ sem)                                                              | 0.41 $\pm$ 0.05 | 0.30 $\pm$ 0.03 | 0.66 $\pm$ 0.13 | 0.22 $\pm$ 0.06 |       |
| Unit isolation quality (isolation distance, Median $\pm$ QD)                                                  | 8.3 $\pm$ 5.5   | 5.9 $\pm$ 12.2  | 14.1 $\pm$ 8.7  | 6.4 $\pm$ 2.7   |       |
| Analyses for the maze morphing from square to cruciform to square                                             |                 |                 |                 |                 |       |
| No. of place cells (spatial information > 0.1 bit/spike & peak firing rate > 1 Hz in any of three situations) | 60              | 24              | 28              | 17              | 129   |
| Spatial information (bits/spike, mean $\pm$ sem)                                                              | 0.67 $\pm$ 0.11 | 0.24 $\pm$ 0.03 | 1.06 $\pm$ 0.17 | 0.96 $\pm$ 0.34 |       |
| Unit isolation quality (isolation distance, Median $\pm$ QD)                                                  | 8.3 $\pm$ 5.6   | 6.7 $\pm$ 6.2   | 6.9 $\pm$ 8.0   | 6.8 $\pm$ 3.6   |       |

52 (\*) The number of cells meeting the criteria had a large difference between the two conditions  
 53 because some cells met the criteria either in the square-shaped maze or in the cruciform maze  
 54 during morphing.

55



56 **Supplemental Video legends**

57

58 **Supplemental Video 1. Morphing of a maze from square to cruciform by S.H. (expert),**  
59 **Related to Figure 1.**

60 **Supplemental Video 2. Morphing of a maze from square to cruciform by K.M. (expert) ,**  
61 **Related to Figure 1.**

62 **Supplemental Video 3. Morphing of a maze from square to cruciform by R.T. (expert) ,**  
63 **Related to Figure 1.**

64 **Supplemental Video 4. Morphing of a maze from square to cruciform by K.I. (beginner) ,**  
65 **Related to Figure 1.**

66 **Supplemental Video 5. Morphing of a maze from square to cruciform by H.A. (beginner) ,**  
67 **Related to Figure 1.**

68 **Supplemental Video 6. Morphing of a maze from square to cruciform by S.T. (beginner) ,**  
69 **Related to Figure 1.**

70

## 71 **Transparent Methods**

72

73 **Maze system implementation.** The reconfigurable maze consists of interlocking runways (49  
74 cm × 10 cm for rats, see Table S1; 39 cm × 5 cm for mice, see Table S2) and an array of  
75 accompanying parts including feeders, movable walls, shut-off sensors, and treadmills. Each  
76 runway is placed atop a tower mounted on a breadboard with a grid of holes (hole-to-hole spacing:  
77 25 mm for rats, 25 mm for mice), that enables each section to be mounted independently of other  
78 runway sections. For rats, each runway made of 5 mm thick black polyvinyl chloride (PVC) (matte  
79 finish) is 55 cm above the breadboard (Table S1). For mice, 3 mm thick gray PVC is 34 cm above  
80 the breadboard (Table S2). The tower and its baseplate are made of aluminum. For rats, the  
81 baseplate has four protrusions that can be inserted into the holes of the breadboard to attach it.  
82 For mice, a bolt was inserted into the holes because the weight of the baseplate was too light to  
83 support the runway. Sidewalls (45 mm height for rats; 30 mm height for mice) around the top of  
84 the runway prevent the rats and mice from slipping off the runway. The elevated runways prevent  
85 the rats and mice from jumping out of the maze. The maze sits within a shielded enclosure (4 m  
86 × 5 m for rats; 1.8 m × 3.0 m for mice) covered by a copper mesh. All metal parts are grounded  
87 to reduce electrical artifacts in the electrophysiological recording.

88 An Arduino Mega controller was used to receive signals from shut-off sensors and to send  
89 activation signals to the actuators in the treadmills and feeders according to the user-defined  
90 sensor and actuator schedule. Custom-made scheduling software written in Matlab was used to  
91 monitor the location of rat or mouse via shut-off sensors and to control the actuators in the  
92 treadmills and feeders, which enables the feeders to be turned on and off according to the location  
93 of rats or mice.

94

95 **Animals.** Ten Long–Evans rats and four C57BL/6J mice purchased from Shimizu Laboratory  
96 Supplies, Co. Ltd. (Kyoto, Japan) were housed individually in cages (20 × 25 × 23 cm for rats,  
97 14 × 21 × 12 cm for mice) where the light was maintained on a 12-hour light/12-hour dark  
98 schedule with the light phase starting at 8:00 am. The tests were performed in the light phase.  
99 The weight of all rats or mice was kept at 80% of free-feeding body weight. To examine  
100 hippocampal place coding on the maze, a custom-made microdrive was implanted into the dorsal  
101 hippocampal CA1 of both hemispheres (eight tetrodes each) of four rats to record multiple single-  
102 unit activities. All procedures were approved by the Doshisha University Institutional Animal Care  
103 and Use Committees.

104

105 **Surgery, electrode preparation, and recording.** Under isoflurane anesthesia, a custom-made  
106 microdrive with 16 independently movable tetrodes was fixed to the skull above the

107 hippocampus of both hemispheres (eight tetrodes each; AP 3.8 mm, ML 3.0 mm, DV 0.5–1.0  
108 mm) of four rats (Table S3). After surgery, the electrodes were individually lowered into the  
109 pyramidal cell layer of the dorsal hippocampal CA1. The extracellular signals were amplified,  
110 buffered, digitized, and continuously sampled at 25 kHz using two 32-channel RHD2000 chips  
111 (Intan Technologies, Inc., CA) via a motorized commutator (*AlphaComm-I*; AlphaOmega Inc.,  
112 Israel). The spikes and local field potential (LFP) were digitally filtered at 800–7.5 kHz and 0.1–  
113 200 Hz, respectively. The occurrence of sharp-wave ripple events in the LFP during immobility  
114 periods was used to estimate the pyramidal cell layer. After spike sorting using *KlustaKwik*,  
115 putative principal cells were distinguished from fast-spiking cells based on average firing rate (5  
116 Hz). We defined place cells if the following criteria were met: the overall firing rate was >0.1 Hz,  
117 spatial information was > 0.1 bit/spike, and maximum firing rate was >1.0 Hz.

118

119 **Behavioral training.** All rats and mice were food-restricted and reduced to 80% of their ad libitum  
120 body weight over a two-week period before training. During this time, they were handled daily. To  
121 train rats or mice to obtain pellets from the food dispenser, they were initially placed on a box (48  
122 cm × 24 cm, 32 cm height for rats; 34 cm × 24 cm, 19.5 cm height for mice) with the food  
123 dispenser at a corner.

124 Rats. The rats were trained on L, C, or G-shaped mazes configured by the reconfigurable maze  
125 system in the testing enclosure where they were habituated to the sounds made by the movable  
126 walls being raised and lowered. The rats performed a small, square-shaped maze task (overall:  
127 120 cm × 49 cm) in which they ran in a clockwise direction to obtain a pellet. The training lasted  
128 until the rat learned to obtain at least one pellet per minute within a 25-minute experimental period.  
129 Next, the rats trained to run in a clockwise direction in a large square-shaped maze (overall: 170  
130 cm × 148 cm) to obtain pellets from two food dispensers located at the left and right sides of the  
131 maze. The training lasted for at least 25 minutes per day and continued until the criteria of at least  
132 one trial per minute was achieved over one week. After the initial training, rats were trained to  
133 perform in the morphing experiment and the spatial alternation tasks described below.

134 Mice. Unlike the rats, the mice were trained on a linear track with a movable wall where they  
135 obtained food pellets at both sides and were habituated to the sounds of the movable wall. The  
136 mice performed a rectangle-shaped maze task (overall: 49 cm × 80 cm). The training lasted until  
137 they learned to obtain at least one pellet per minute for 25-minute intervals. After the initial training,  
138 they were trained to run on the figure-8 shaped maze, double T-maze, plus maze, and W-maze  
139 to obtain food pellets.

140

141 **Morphing experiment.** Four rats were trained to run in a clockwise direction on the maze  
142 morphing from square to cruciform to square. They ran within ~1 hour in the following sequence:

143 square maze, cruciform maze, and square maze. The 15-minute long sequences were spaced at  
144 ~5-minute intervals, and the rats were rewarded each time they arrived at the food dispensers  
145 located at both the left and right sides of the maze. Each maze morphing was done within  
146 approximately 5 minutes. The unit recording was made after the rats had experienced the maze  
147 morphing over a few days.

148

#### 149 **Spatial alternation task.**

150 Rats. Five rats were trained to alternate between left and right at a decision point on the figure-  
151 8 shaped maze until they achieved an 85% correct rating for 25 minutes. A delay period was then  
152 incorporated. During the delay period, rats were locked between two movable walls in front and  
153 behind a treadmill. The treadmill rotated at a constant speed (~20 m/min) during the delay period.  
154 The delay period was incremented from 1 sec to 7 sec every testing day.

155 Mice. Three mice were trained to alternate left and right at two decision points on the double T  
156 maze until they achieved a 75% correct rating for an hour (Figure 4g).

157

158 **Animal trajectory and head direction.** The tip and root of the head were tracked from images  
159 captured at 50 or 100 frames per second by a USB3.0 digital video camera mounted on the ceiling  
160 of the enclosure using *DeepLabCut* (Mathis *et al.*, 2018). Initially, 200 annotated images were  
161 used to train the pre-trained ResNet-50 network using transfer learning. A few additional iterations  
162 of training were then performed with the goal that all Euclidian distances between tracked  
163 locations in adjacent frames would be under 50 pixels. Running trajectory was reconstructed by  
164 concatenating the tracked root of the head. Head direction was computed from the tip and root of  
165 the head by the inverse of the tangent function.

166

167 **Analyses.** The rat's trajectory was linearized for each trial by projecting the actual trajectory onto  
168 a predefined idealized trajectory using nearest-neighbor Delaunay triangulation. Spatial bins had  
169 a resolution of approximately 3 cm.

170 Rate map. A firing rate map of well-isolated neurons was constructed in a standard manner by  
171 dividing the total number of spikes in a bin (3 cm × 3 cm) at a given location by the total amount  
172 of time that the rat has been in that bin. Each value was smoothed with a Gaussian filter with a  
173 variance of three.

174 MUA. MUA was calculated by summing the firing of all monitored cells including low-firing cells  
175 and fast-spiking cells.

176 Spatial information. The spatial information (bits per spike) was used to measure how much  
177 information a spike conveys about the rat's location on the maze (Skaggs *et al.*, 1993). This is  
178 calculated by the following formula:

179 
$$\text{Spatial information} = \sum_i P_i \left( \frac{R_i}{R} \right) \log_2 \left( \frac{R_i}{R} \right)$$

180 where  $i$  indexes over the position bins,  $P_i$  is the probability that the rat was in bin  $i$ ,  $R_i$  is the mean  
 181 firing rate in bin  $i$ , and  $R$  is the overall mean firing rate. On the basis of the spatial information,  
 182 we identified the place cells.

183 Spatial and rate similarity measures. The spatial similarity is expressed by calculating the  
 184 spatial correlation of place fields between the spatially overlapping paths of the square and  
 185 cruciform mazes. The difference in firing rates was expressed by calculating a difference/sum  
 186 score (Leutgeb *et al.*, 2005). The unsigned difference between the two maximum firing  
 187 frequencies was calculated, and the difference was divided by the sum of the two rates to obtain  
 188 the score for a set of conditions during maze morphing. Both similarities were also expressed  
 189 using the cumulative distribution function,  $f(X < x)$ , which gives the probability that the variable  
 190  $X$  will be  $X < x$  for each real number  $x$ .

191 Bayesian decoding. A memoryless Bayesian decoder (Zhang *et al.*, 1998) was used to decode  
 192 the rat's locations on the basis of place cell activity. First, the probability of an rat's location given  
 193 place cell firings within a time window was estimated as follows:

194 
$$\text{Prob}(Pos | spikes) = \left( \prod_{i=1}^N f_i(Pos)^{n_i} \right) \exp^{-\tau \sum_{i=1}^N f_i(Pos)}$$

195 where  $f_i$  and  $n_i$  represent the place map and the number of spikes of the  $i$ -th place cell within the  
 196 time window, respectively,  $N$  indicates the total number of place cells, and  $\tau$  represents the  
 197 duration of the time window.

198 The probability within each time window was normalized for every location as follows (Pfeiffer  
 199 and Foster, 2013):

200 
$$\text{nProb}(Pos | spikes) = \frac{\text{Prob}(Pos_k | spikes)}{\sum_{k=1}^M \text{Prob}(Pos_k | spikes)}$$

201 where  $\text{Prob}(Pos_k | spikes)$  represents the probability at the  $k$ th location bin within the time window,  
 202 and  $M$  represents the total number of location bins.

203 The time window was set at 300 ms. A point estimation of the location was made using the  
 204 maximum likelihood estimation.

205

206 **Statistical analyses.**

207 Analyses of rat's behavior around the gaps. Any value of running speed or head direction that  
 208 exceeded more than three times the local scaled median absolute deviations (MAD) away from  
 209 the local median within a sliding window (~72 cm) was defined as an outlier. The two-tailed

210 Wilcoxon rank-sum test was used to assess the gap effect on rat's behaviors in terms of running  
211 speed and head direction (Fig. 2b–c). Differences in running speed and head direction between  
212 gap locations between runways and the corresponding locations on the long gapless runway were  
213 assessed by two-way repeated-measures ANOVA (Fig. S4b–c). Differences in occupancy time at  
214 gap locations were assessed by one-way repeated-measures ANOVA (Fig. 2d). The occupancy  
215 time was calculated as the duration when the rat occupied the gap location. The duration while  
216 the rat paused (running speed < 5 cm/s) was excluded from the analysis.

217 Analyses of neural activity around the gaps. To examine whether the width of the place field  
218 was specifically changed at the gap locations, the Monte Carlo method was used. For each cell,  
219 the original place field location was shifted by a pseudo-random interval between 20 bins and 20  
220 bins less than the length of the entire linearized track, with the end of the track wrapped to the  
221 beginning. This procedure was repeated 3,000 times for each cell. For each shuffling, the width  
222 of place field that is defined as the length of the firing field whose firing rate is over one-third of its  
223 maximum firing rate was calculated. Whether the place field on the gaps had a width greater than  
224 the 5<sup>th</sup> percentile or lower than the 95<sup>th</sup> percentile of the shuffled data was examined (Fig. 3b).  
225 Two-tailed Wilcoxon rank-sum test was used to assess the number of place fields, firing rates of  
226 MUA, and Bayesian decoding errors on the gap locations as compared with those on the non-  
227 gap locations (Fig. 3c-d, f).

228 Analyses of learning performance. The differences in learning curves were assessed using one-  
229 way repeated-measures ANOVA (Fig. 4). Two-way mixed ANOVA was used to ascertain the effect  
230 of expertise and experience on assembly time, and their potential interaction (Fig. 1j-k). The  
231 difference in spatial and rate similarities was assessed using the two-tailed Wilcoxon signed-rank  
232 test (Fig. 5c–d).

233

234 **Analysis software.** All analyses were performed using custom-made programs based on  
235 Matlab functions (v9.6; MathWorks, Natick, MA).

236

237 **Histology.** To identify the final recording locations, four rats were deeply anesthetized with  
238 isoflurane (Pfizer Japan Inc., Tokyo, Japan) and then given an overdose of pentobarbital sodium  
239 salt (50mg/kg, intraperitoneal (i.p.); Nacalai Tesque Inc., Kyoto, Japan) and transcardially  
240 perfused with phosphate-buffered saline (PBS), followed by 10% phosphate buffered formalin  
241 fixative (3.5-3.8% formaldehyde). Their brains were cut coronally at 40  $\mu$ m and stained with  
242 cresyl violet. The final location of the tip of each electrode was around or below the pyramidal  
243 cell layer of the dorsal hippocampal CA1.

244

245

246 **Supplemental References**

247 Leutgeb, S. *et al.* (2005) 'Independent codes for spatial and episodic memory in  
248 hippocampal neuronal ensembles.', *Science*, 309(July), pp. 619–623. doi:  
249 10.1126/science.1114037.

250 Mathis, A. *et al.* (2018) 'DeepLabCut: markerless pose estimation of user-defined  
251 body parts with deep learning', *Nature Neuroscience*, 21(9), pp. 1281–1289. doi:  
252 10.1038/s41593-018-0209-y.

253 Pfeiffer, B. E. and Foster, D. J. (2013) 'Hippocampal place-cell sequences depict  
254 future paths to remembered goals.', *Nature*, 497, pp. 74–9. doi:  
255 10.1038/nature12112.

256 Skaggs, W. E. *et al.* (1993) 'An information-theoretic approach to deciphering the  
257 hippocampal code', *Advances in neural information processing systems*. Edited  
258 by S. J. Hanson, J. D. Cowan, and C. L. Giles, 5(2), pp. 1031–1037.

259 Zhang, K. *et al.* (1998) 'Interpreting neuronal population activity by reconstruction:  
260 unified framework with application to hippocampal place cells.', *Journal of  
261 neurophysiology*, 79, pp. 1017–1044.

262
